# Supplementary material
Source: publisher site journal article supplement (https://www.dovepress.com/article/316026)
Supplement: Supplementary file 1 [file Supplementary-Figures-1-4.pdf › Supplementary-Figures-1-4.pdf]

## Supplementary Figure 1A

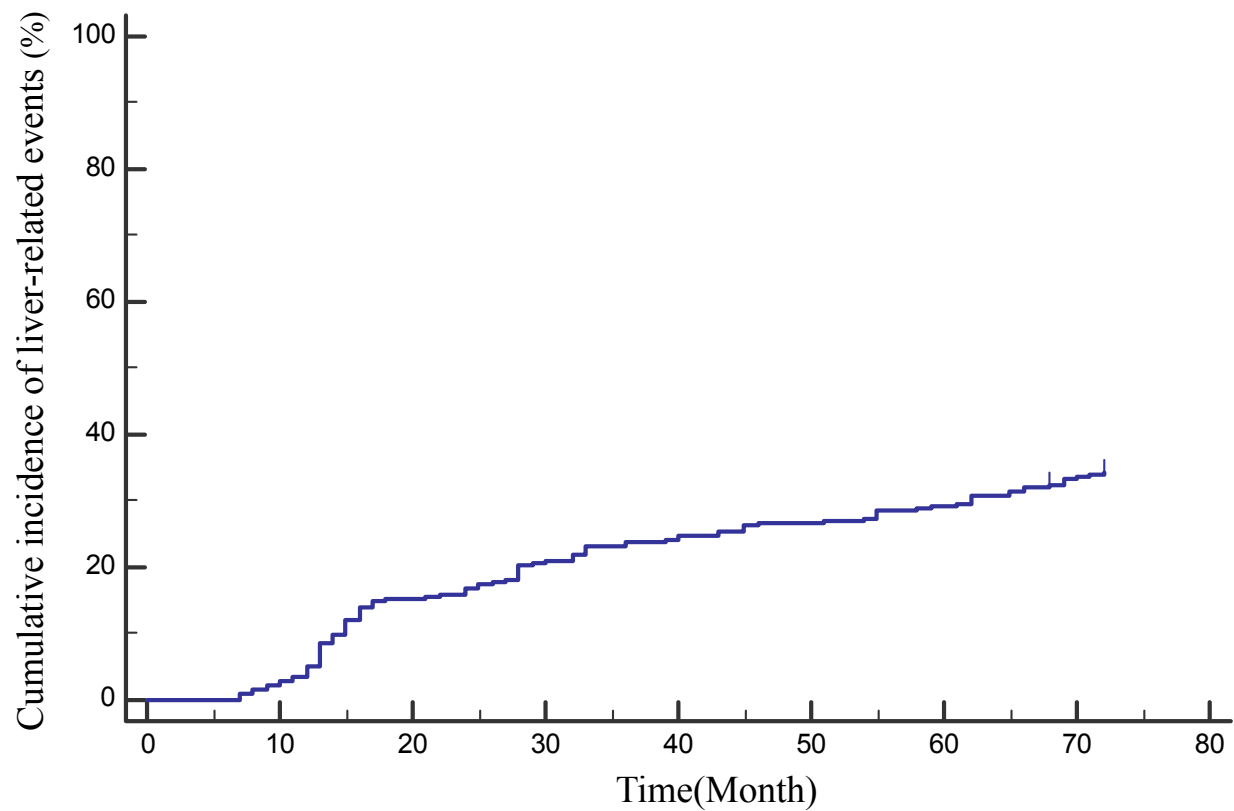

Supplementary Figure 1A. Cumulative incidence of liver-related events

## Supplementary Figure 1B

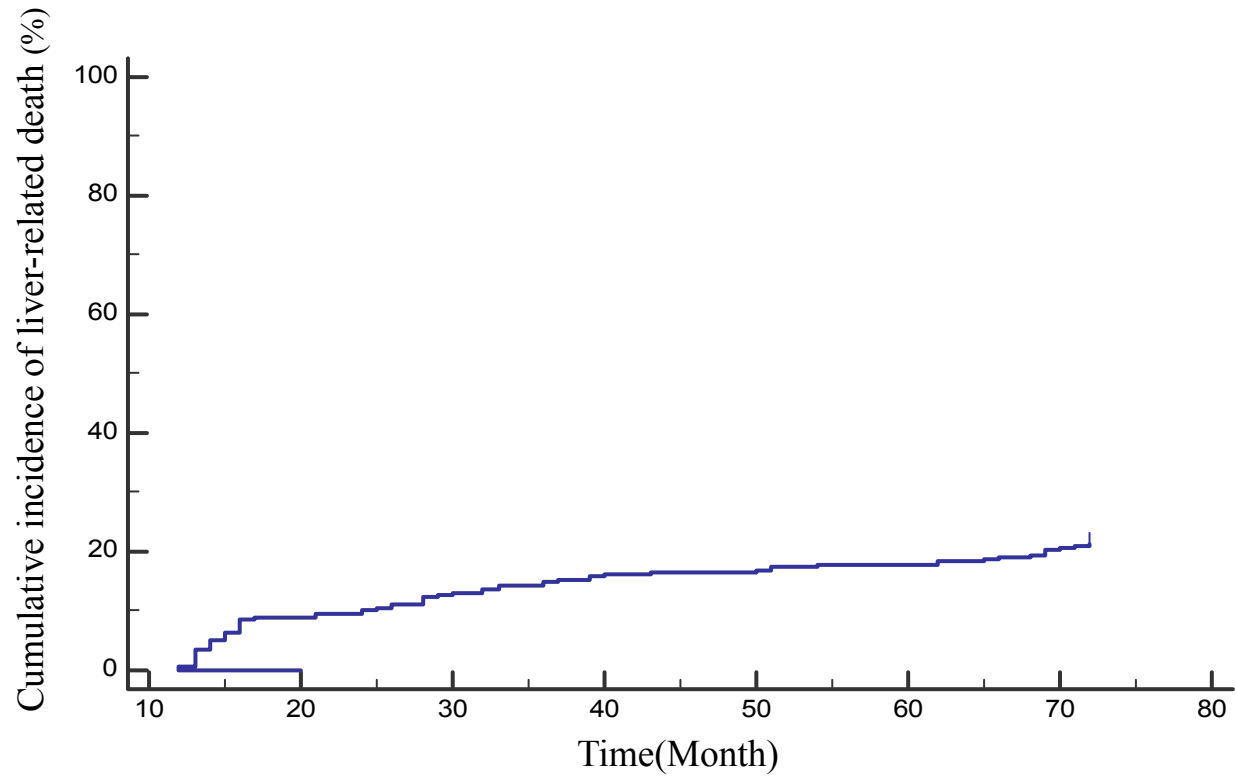

Supplementary Figure 1B. Cumulative incidence of liver-related mortality

### Supplementary Figure 1C

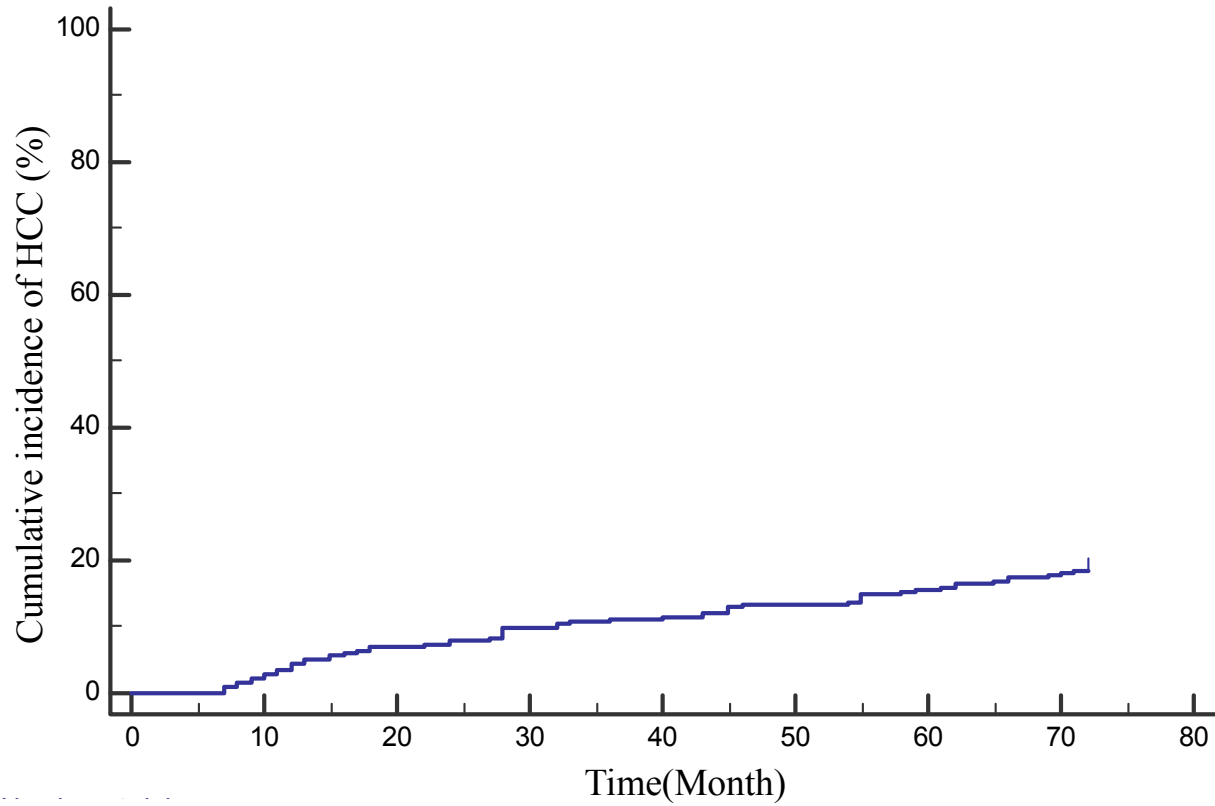

Supplementary Figure 1C. Cumulative incidence of hepatocellular carcinoma

## Supplementary Figure 2

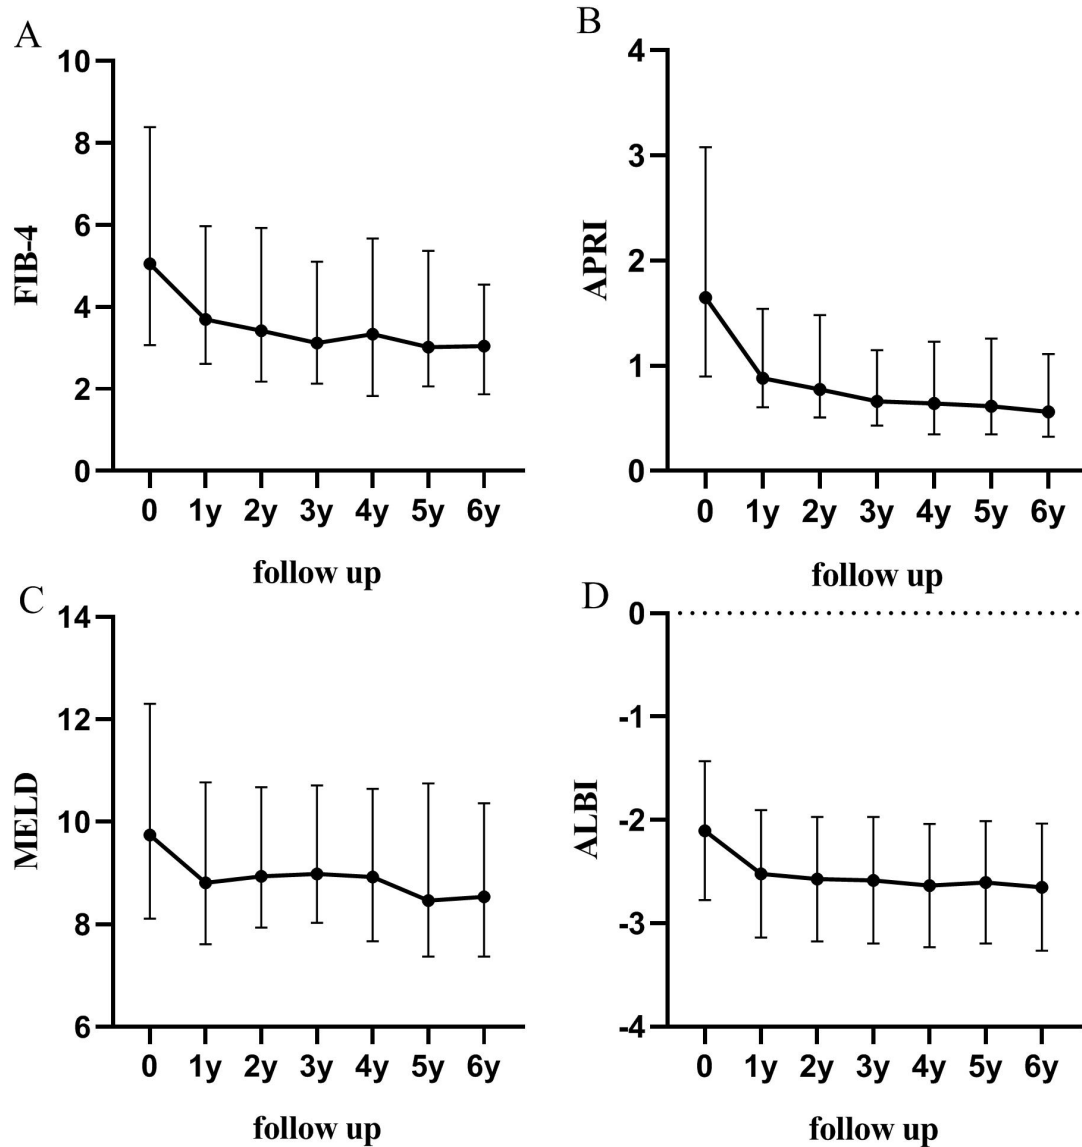

Supplementary Figure 2. Dynamic changes in noninvasive models including FIB-4 (A), APRI (B), MELD (C), and ALBI (D) in patients without liver-related events over 6 years.

### Supplementary Figure 3

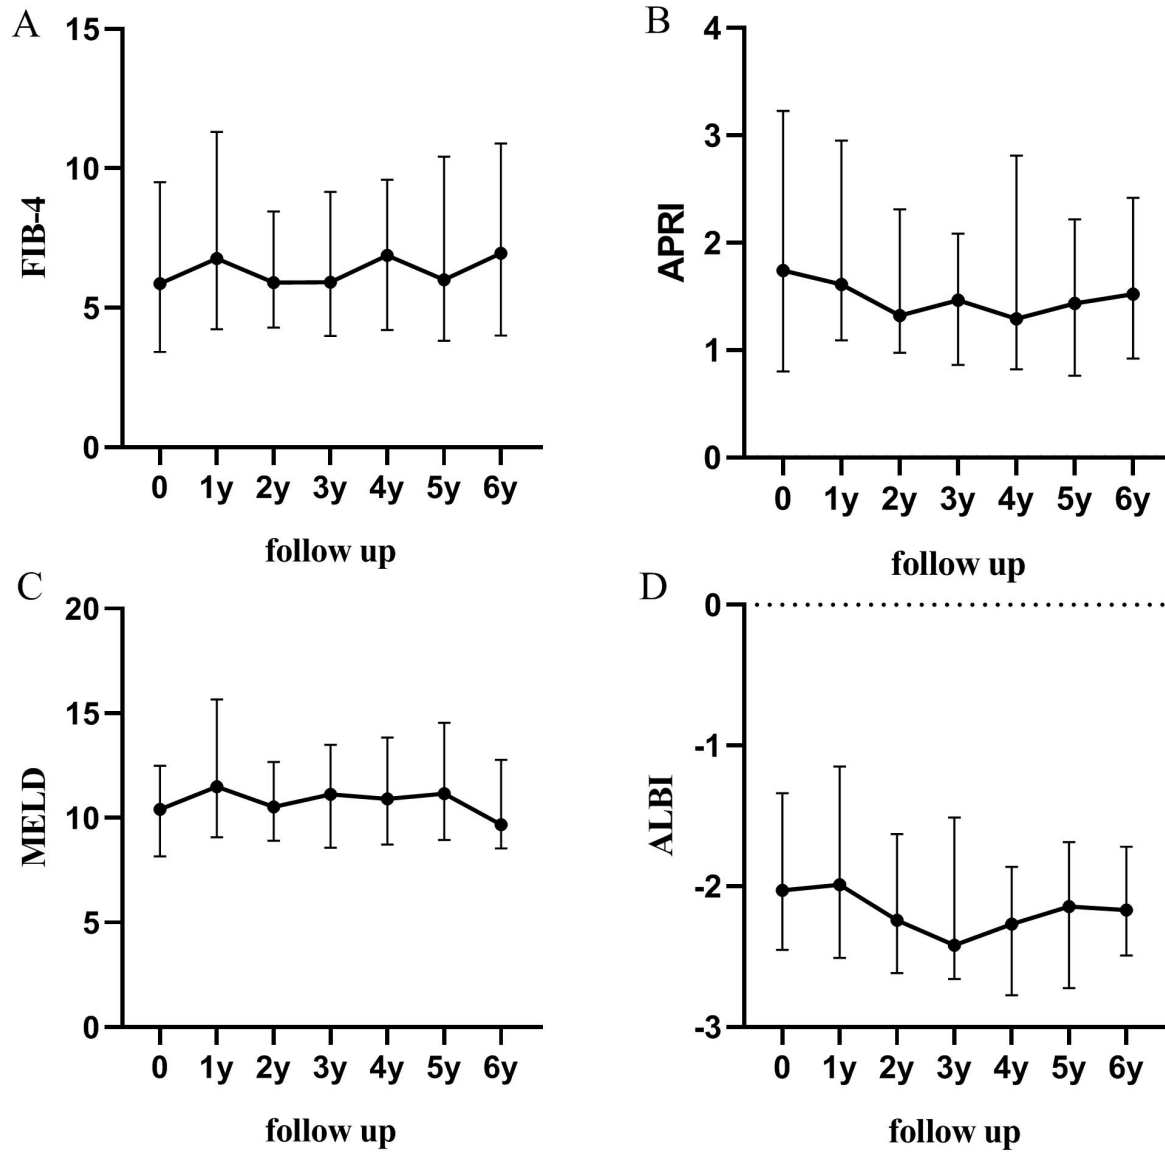

Supplementary Figure 3. Dynamic changes in noninvasive models including FIB-4 (A), APRI (B), MELD (C), and ALBI (D) in patients with liver-related events over 6 years.

## Supplementary Figure 4

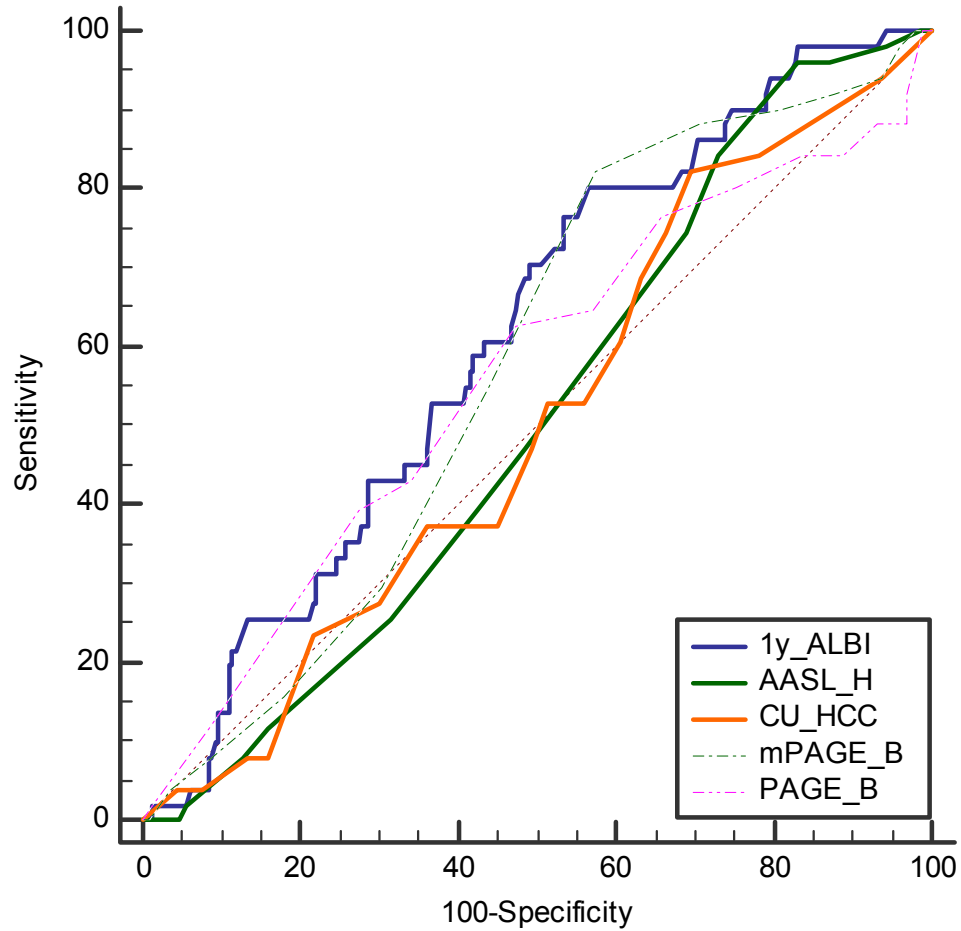

Supplementary Figure 4 Comparison of AUROCs for the prediction of HCC.
